# Supplementary material for: A comparison of structural–functional equation models to identify fatty acids on three common gas chromatography columns
Source: Royal Society of Chemistry journal article supplement (doi:10.1039/c7ay02456h), 2017-12-05
Supplement: c7ay02456h4.pdf [file c7ay02456h4.pdf]

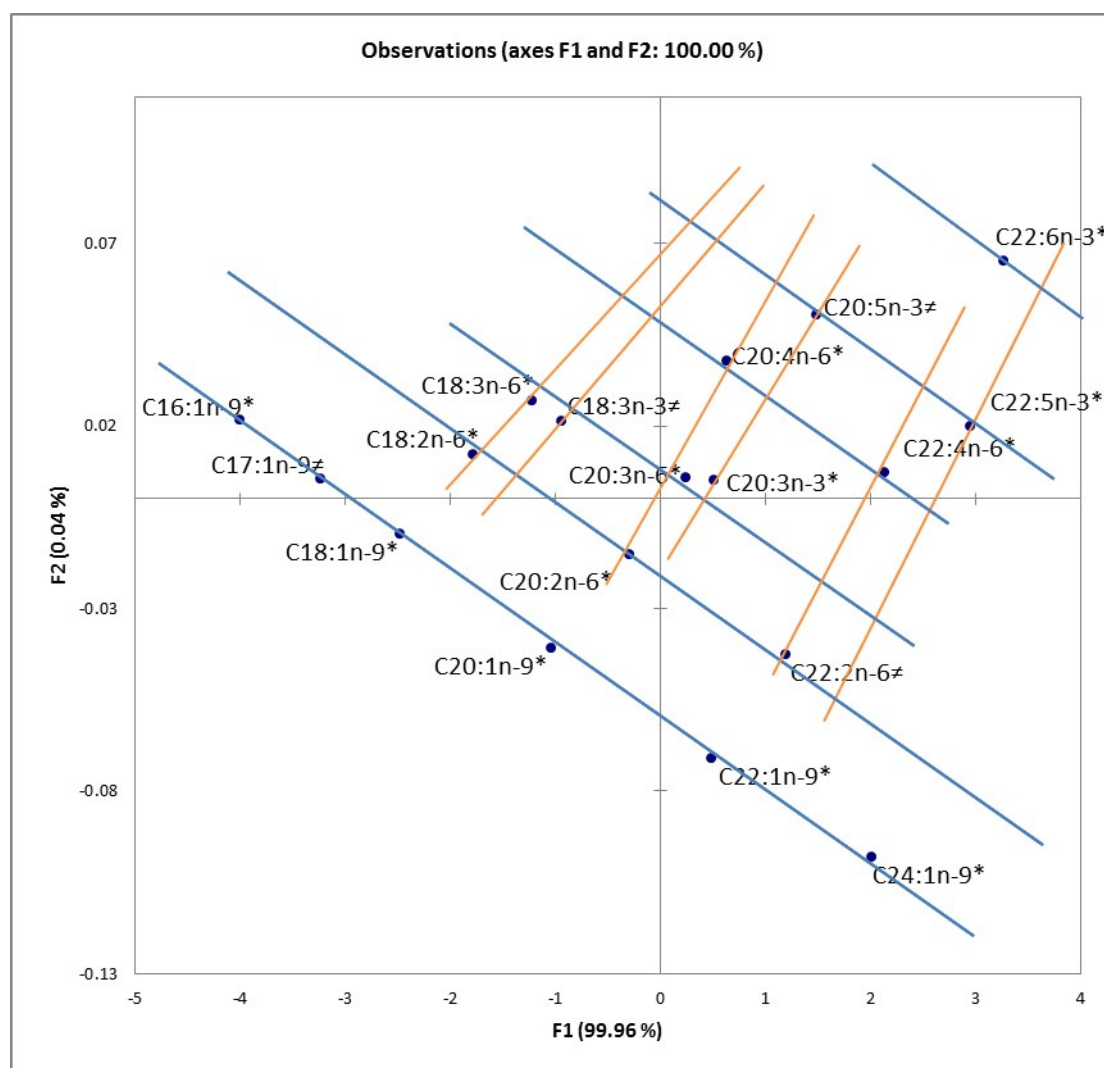

**Fig. 8:** Score plot from PCA with the C18-C24 fatty acids as objects. Variables were the four programs selected from Table 1 for the SP-2560 column.
